# Supplementary material
Source: PubMed Central journal article supplement (PMC4076922)
Supplement: NIHMS586764-supplement-01.pdf [file NIHMS586764-supplement-01.pdf]

Type of file: table

Label: Supplementary Table 1

Filename: visne\_paper\_table\_1\_12142012.xlsx

| Target         | Clone        | Metal Isotope  | Staining Concentration (ug/ml) |
|----------------|--------------|----------------|--------------------------------|
| CD10           | HI10a (BL)   | 156 Gd         | 1                              |
| CD114          | LMM741 (BL)  | 156 Gd         | 2                              |
| CD117          | 104D2 (BL)   | 171 Yb         | 1                              |
| CD11b          | ICRF44 (BL)  | 144 Nd         | 3                              |
| CD11c          | 3.9 (BL)     | 154 Sm         | 5                              |
| CD123          | 9F5 (BD)     | 151 Eu         | 3                              |
| CD13           | L138 (BD)    | 168 Er         | 1                              |
| CD133          | AC133 (MB)   | 141 Pr         | 3                              |
| CD14           | M5E2 (BL)    | 160 Gd         | 2                              |
| CD15           | W6D3 (BL)    | 164 Dy         | 2                              |
| CD16           | 3G8 (BL)     | 165 Ho         | 2                              |
| CD161          | HP-3G10 (BL) | 150 Nd         | 5                              |
| CD179a         | HSL96 (BL)   | 149 Sm         | 2                              |
| CD19           | HIB19 (BD)   | 142 Nd         | 1.5                            |
| CD2            | TS1/8 (BL)   | 152 Sm         | 0.5                            |
| CD20           | 2H7 (BL)     | 147 Sm         | 3                              |
| CD20 cytosolic | H1 (BD)      | 147 Sm         | 3                              |
| CD22           | HIB22 (BL)   | 168 Er         | 1                              |
| CD235a/b       | HIR2 (BL)    | 141 Pr         | 2                              |
| CD3            | S4.1 (QD)    | 110 Cd         | 1:200                          |
| CD3            | UCHT1 (BL)   | 170 Er         | 0.5                            |
| CD33           | P67.6 (BD)   | 158 Gd; 173 Yb | 1.5                            |
| CD34           | 8G12 (BD)    | 148 Nd         | 3                              |
| CD38           | HIT2 (BL)    | 159 Tb; 168 Er | 1                              |
| CD4            | RPA-T4 (BL)  | 145 Nd         | 3                              |
| CD41           | HIP8 (BL)    | 152 Sm         | 1                              |
| CD44           | G44-26 (BD)  | 166 Er         | 1                              |
| CD45           | HI30 (BL)    | 115 In; 154 Sm | 2                              |
| CD45RA         | HI100 (BL)   | 139 La         | 3                              |
| CD47           | B6H12 (BD)   | 145 Nd; 172 Yb | 2                              |
| CD49d          | 9F10 (BL)    | 144 Nd         | 1                              |
| CD5            | UCHT2 (BL)   | 154 Sm         | 1                              |
| CD56           | B159 (BD)    | 170 Er         | 2                              |
| CD61           | VI-PL2 (BD)  | 169 Tm         | 0.25                           |
| CD64           | 10.1 (BL)    | 153 Eu         | 1                              |
| CD7            | M-T701 (BD)  | 167 Er         | 2                              |
| CD79b          | CB3-1 (BL)   | 146 Nd         | 2                              |
| CD8            | RPA-T8 (BL)  | 146 Nd         | 1.5                            |
| CD90           | 5E10 (BL)    | 176 Yb         | 5                              |
| CXCR4          | 12G5 (BL)    | 175 Lu         | 3                              |

|        |               |               |   |
|--------|---------------|---------------|---|
| Flt3   | BV10A4H2 (BL) | <b>150 Nd</b> | 2 |
| HLA-DR | L243 (BL)     | <b>174 Yb</b> | 2 |
| IgD    | IA6-2 (BL)    | <b>145 Nd</b> | 1 |
| IgM    | G20-127 (BD)  | <b>153 Eu</b> | 2 |
| preBCR | HSL2 (BL)     | <b>165 Ho</b> | 3 |
| TdT    | E17-1519 (BD) | <b>151 Eu</b> | 3 |
| TIM-3  | 344823 (RD)   | <b>169 Tm</b> | 1 |

**Vendors: Invitrogen Qdot655 (QD); Biolegend (BL); BD Biosciences (BD); Miltenyi Bio (RD); DVS Sciences (DVS); VWR International (VWR); eBioscience (EB); Cell Signali**



**otec (MB); R&D Systems  
ing Technologies (CST)**

Type of file: table

Label: Supplementary Table 2

Filename: visne\_paper\_table\_2\_12142012.xlsx

| Figure | Section  | Dataset                                  | Cells subsampled                                                       |
|--------|----------|------------------------------------------|------------------------------------------------------------------------|
| 1      | B/D      | Marrow1                                  | 10,000 cells from Marrow1                                              |
| 2      | A left   | The exact same cells as Figure 1B/D      |                                                                        |
|        | A middle |                                          |                                                                        |
|        | A right  |                                          |                                                                        |
|        | B        | Marrow 1                                 | Combination of 3,000 B cells and 3,000 myeloid cells from Marrow1      |
| 3      | A/B      | Marrow2                                  | Combination of 4,000 cells from each of these samples                  |
|        |          | Marrow3                                  |                                                                        |
|        |          | Marrow4                                  |                                                                        |
|        | C        | Marrow5                                  | Combination of 2,500 cells from each of these samples                  |
|        |          | Marrow6                                  |                                                                        |
|        |          | ALL A                                    |                                                                        |
|        | ALL B    |                                          |                                                                        |
| 4      | A        | ALL A                                    | 10,000 cells from ALL A                                                |
|        |          | ALL B                                    | 10,000 cells from ALL B                                                |
|        |          | AML A                                    | 10,000 cells from AML A                                                |
|        |          | AML B                                    | 10,000 cells from AML B                                                |
|        | B        | The exact same cells as Figure 4A, ALL a |                                                                        |
| 5      |          | AML Diagnosis                            | Combination of 5,000 cells from each of these samples                  |
|        |          | AML Relapse                              |                                                                        |
| 6      |          | MRD                                      | 10,000 cells, biased subsampling from each of these samples (see text) |
|        |          | Control                                  |                                                                        |

| Markers used                                                                                                                                                                                  |
|-----------------------------------------------------------------------------------------------------------------------------------------------------------------------------------------------|
| CD11b, CD123, CD19, CD20, CD3, CD33, CD34, CD38, CD4, CD45, CD45RA, CD8, CD90                                                                                                                 |
| CD11b, CD123, CD19, CD20, CD3, CD33, CD34, CD38, CD4, CD45, CD45RA, CD8, CD90                                                                                                                 |
| CD11b, CD123, CD19, CD20, CD3, CD34, CD38, CD4, CD45, CD45RA, CD8, CD90                                                                                                                       |
| CD11b, CD123, CD34, CD38, CD4, CD45, CD45RA, CD8, CD90                                                                                                                                        |
| CD38, CD4, CD45                                                                                                                                                                               |
| CD10, CD117, CD11a, CD123, CD127, CD179b, CD19, CD2, CD20, CD22, CD235, CD3, CD33, CD34, CD38, CD43, CD45, CD45RA, CD45RO, CD47, CD49d, CD5, CD61, CD7, CD79b, CXCR4, HLADR, IgD, IgM         |
| CD10, CD117, CD11b, CD127, CD133, CD179a, CD179b, CD19, CD20, CD22, CD24, CD3, CD33, CD34, CD38, CD43, CD45, CD45RA, CD47, CD49d, CD61, CD7, CD72, CD79b, CXCR4, Flt3, HLA-DR, IgM, preBCR    |
| CD10, CD117, CD11b, CD127, CD133, CD179a, CD179b, CD19, CD20, CD22, CD24, CD3, CD33, CD34, CD38, CD43, CD45, CD45RA, CD47, CD49d, CD61, CD7, CD72, CD79b, CXCR4, Flt3, HLA-DR, IgM, preBCR    |
| CD114, CD117, CD123, CD133, CD14, CD15, CD16, CD19, CD2, CD20, CD22, CD3, CD33, CD34, CD38, CD44, CD45, CD45RA, CD47, CD49d, CD5, CD56, CD64, CD7, CD79b, CD90, CXCR4, Flt3, HLADR, IgD, TIM3 |
| CD10, CD15, CD20, CD3, CD34, CD38, CD45, CD7                                                                                                                                                  |
